# Supplementary material for: Piezo1 links mechanical forces to red blood cell volume
Source: eLife journal article supplement (doi:10.7554/elife.07370), 2015-05-22
Supplement: supp [file elife-07370-supp-v1.zip]

Archive with 5 entries (5 files):
- elife_poa_e07370_Figure_3_figure_supplement_1.pdf
- elife_poa_e07370_Video_1.mp4
- elife_poa_e07370_Figure_2_figure_supplement_1.pdf
- elife_poa_e07370_Figure_1_figure_supplement_2.pdf
- elife_poa_e07370_Figure_1_figure_supplement_1.pdf
