# Supplementary figures and images for: Piezo1 links mechanical forces to red blood cell volume
Source: eLife journal article supplement (doi:10.7554/elife.07370), 2015-05-22

## Figure 3 - Figure Supplement 1

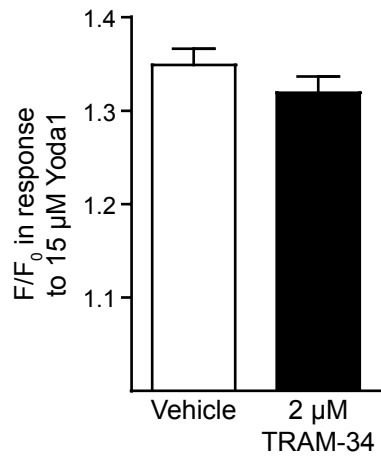

Supplement: supp [file elife-07370-supp-v1.zip › elife_poa_e07370_Figure_3_figure_supplement_1.pdf]

## Figure 2 - Figure Supplement 1

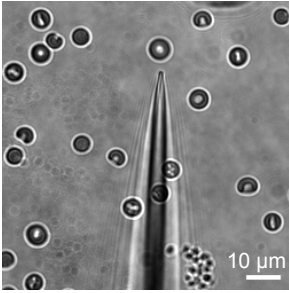

Supplement: supp [file elife-07370-supp-v1.zip › elife_poa_e07370_Figure_2_figure_supplement_1.pdf]

# Figure 1 - Figure Supplement 2

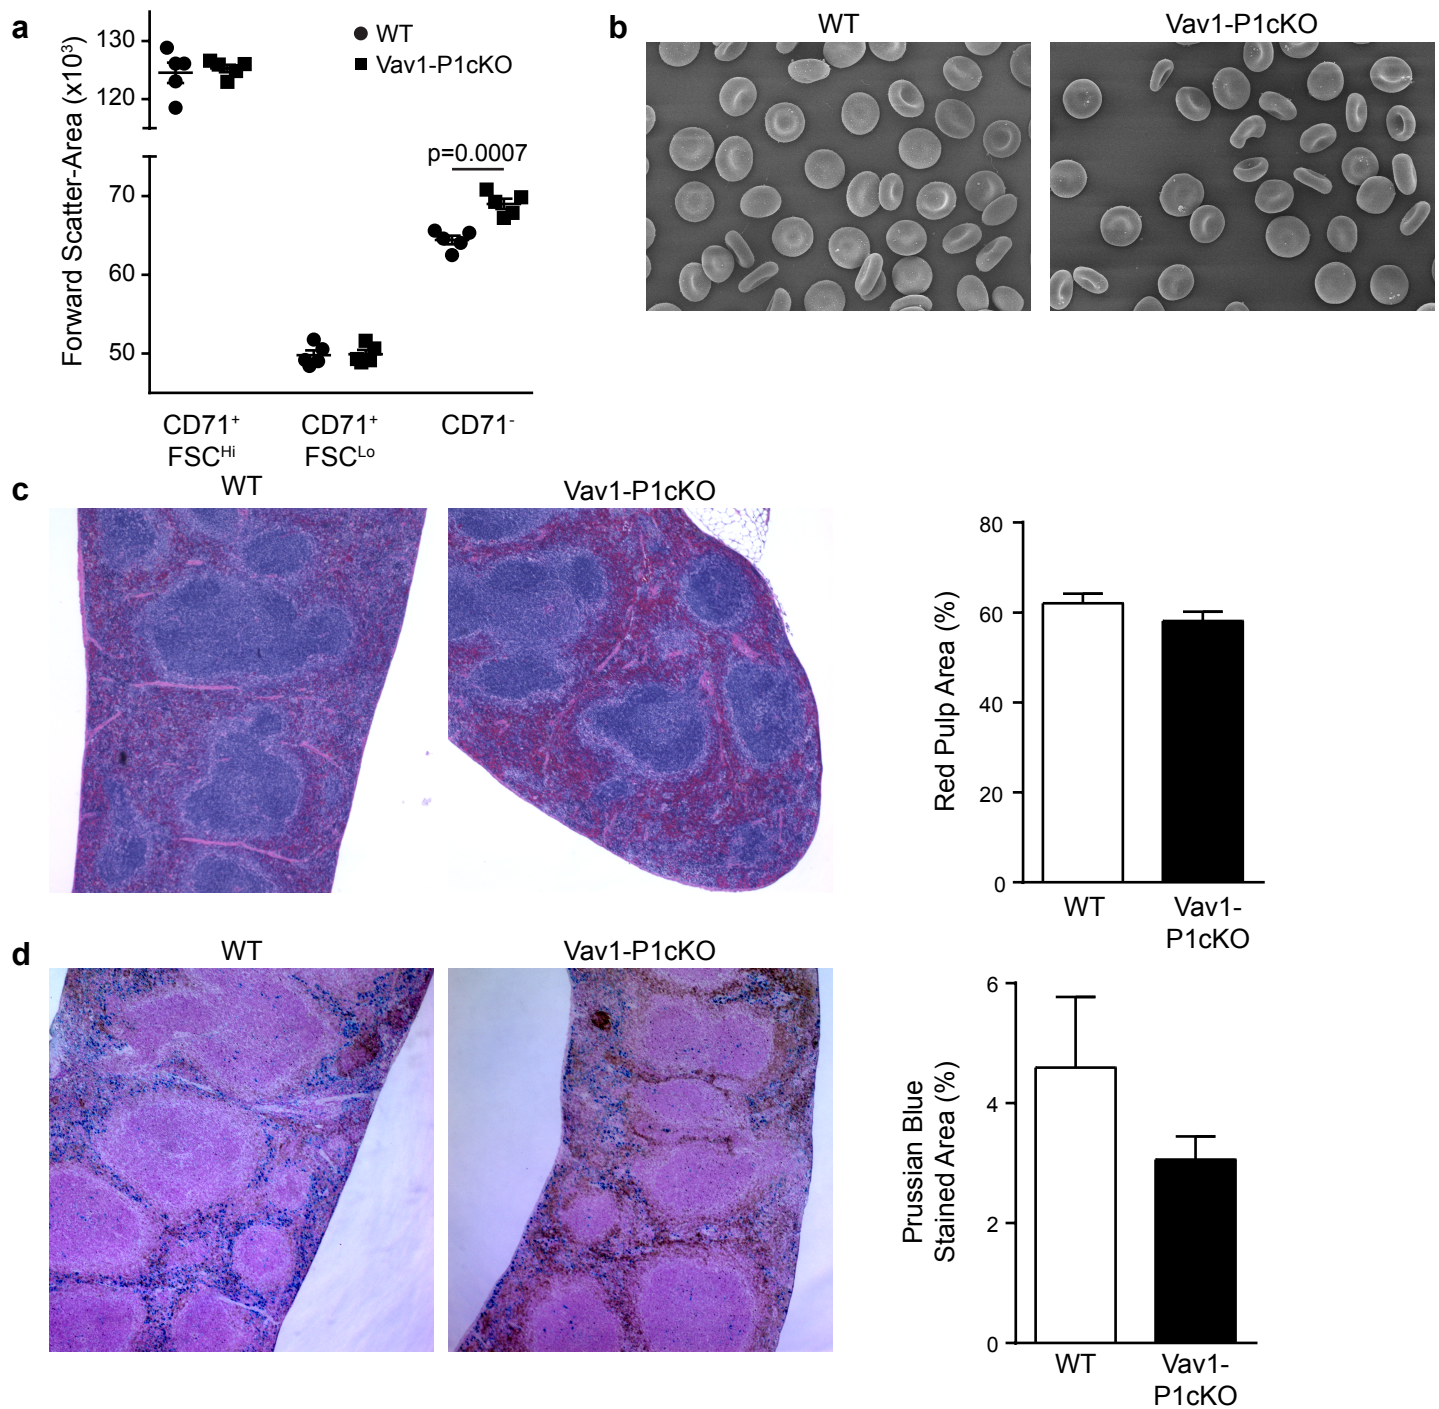

Supplement: supp [file elife-07370-supp-v1.zip › elife_poa_e07370_Figure_1_figure_supplement_2.pdf]

# Figure 1 - Figure Supplement 1

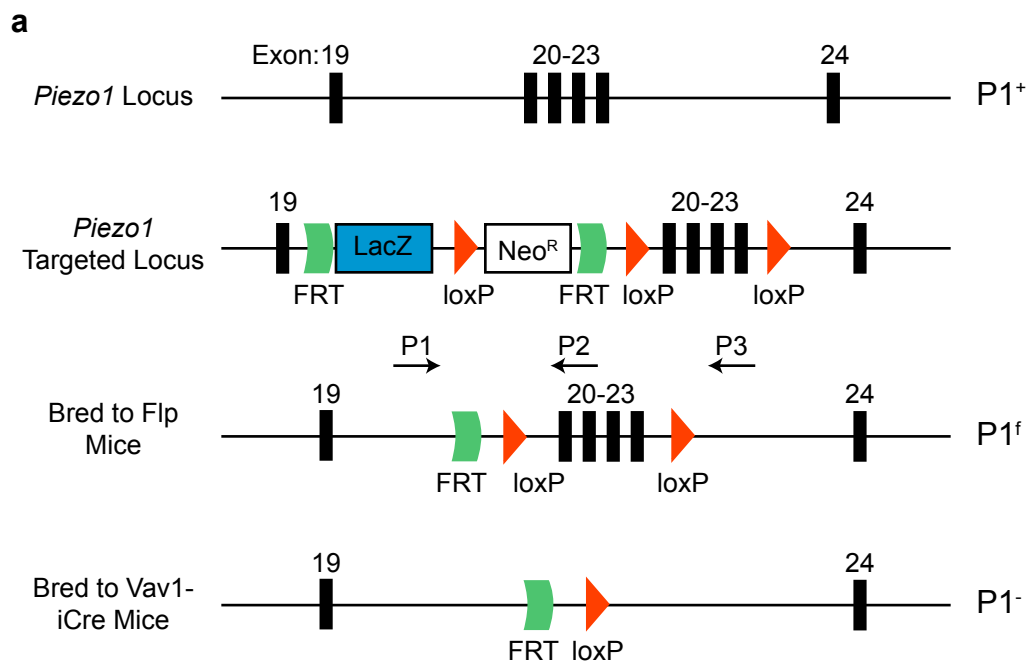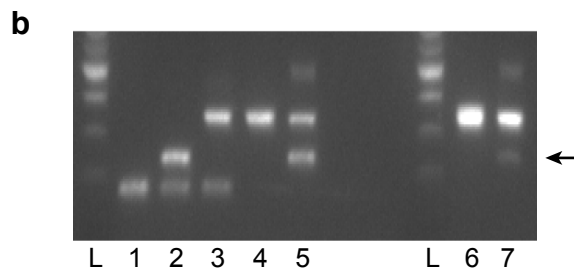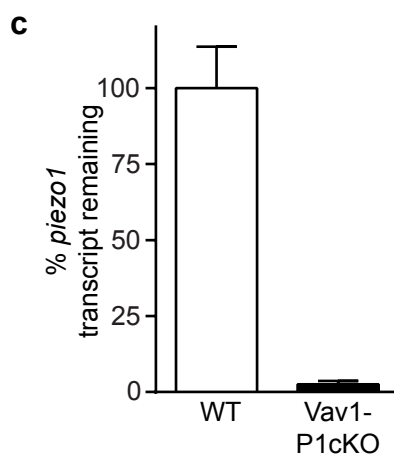

Supplement: supp [file elife-07370-supp-v1.zip › elife_poa_e07370_Figure_1_figure_supplement_1.pdf]
